# Supplementary material for: Health system barriers and facilitators to medication adherence for the secondary prevention of cardiovascular disease: a systematic review
Source: PubMed Central journal article supplement — Open Heart. 2016 Sep 14;3(2):e000438. doi: 10.1136/openhrt-2016-000438 (PMC5030589; doi:10.1136/openhrt-2016-000438), 2016-09-14
Supplement: openhrt-2016-000438supp_appendix.pdf [file openhrt-2016-000438supp_appendix.pdf]

## Appendix 1. SEARCH STRATEGY

### Search terms

In the first stage, broad search terms were used and in the second stage, more focused terms were used:

1. “prevention”, “policy”, “health systems”, “cardiovascular”, “drugs”
2. “barriers”, “facilitators”

### Databases

Stage 1 search: Pubmed

Stage 2 search: Global Health, Cochrane, Latin American and Caribbean Health Sciences Literature (LILACS), Africa-Wide Information, Index Medicus for the South-East Asian Region (IMSEAR), Index Medicus for the Eastern Mediterranean Region (IMEMR) Western Pacific Rim Region Index Medicus (WPRIM), (Sociofile, PsychLit, PAIS, IBSS, IPSA and HealthStar), Health System Evidence ([www.healthsystemsevidence.org](http://www.healthsystemsevidence.org)) and EVIPnet.

HMIC (Health Management)

EMBase (pharma-OVID)

Psychinfo(Ovid)

Stage 3 search: Review of relevant articles, conference proceedings, expert opinion

### Stage 1 search

#### Search terms

("humans"[All Fields]) AND ((((\*prevention/) AND ((((((  
((( (\*policy) OR \*health systems) OR  
\*delivery of healthcare/) OR \*primary healthcare/) OR \*h  
ealth services accessibility/) OR  
\*health services research/) OR \*financing, government/))  
AND (((((((((cardiovascular disease/  
OR \*myocardial infarction/) OR \*acute coronary syndromes)  
OR (\* AND ((ischaemic OR  
coronary) AND heart disease))) OR (\*peripheral AND (vascu  
lar OR arterial) AND disease))  
OR \*cerebrovascular disease/) OR (\*stroke OR transient isc  
haemic attacks)))))) AND (drugs  
OR medicines OR medications))

#### Search Strategy used for Pubmed

("humans"[All Fields]) AND ((((\*prevention/) AND (((((((((( (\*policy) OR \*health systems)  
OR \*delivery of healthcare/) OR \*primary healthcare/) OR \*health services  
accessibility/) OR \*health services research/) OR \*financing, government/)) AND  
((((((((((cardiovascular disease/) OR \*myocardial infarction/) OR \*acute coronary  
syndromes) OR (\* AND ((ischaemic OR coronary) AND heart disease))) OR  
(\*peripheral AND (vascular OR arterial) AND disease)) OR \*cerebrovascular  
disease/) OR (\*stroke OR transient ischaemic attacks)))))) AND (drugs OR medicines  
OR medications))

### Search Strategy used for Pubmed

1. \*cardiovascular disease/ (1925838)
2. \*myocardial infarction/ (196118)
3. \*acute coronary syndromes/ (23620)
4. \*((ischaemic OR coronary) AND heart disease) (829052)
5. \*peripheral AND (vascular OR arterial) AND disease (32365)
6. \*cerebrovascular disease/ (288502)
7. \*stroke OR transient ischaemic attacks (223015)
8. 1 OR 2 OR 3 OR 4 OR 5 OR 6 OR 7 (2074187)
9. \*policy/ (249454)
10. \*health systems/ (152720)
11. \*delivery of healthcare/ (807321)
12. \*primary healthcare/ (171255)
13. \*health services accessibility/ (84317)
14. \*health services research/ (262948)
15. \*financing, government/ (82785)
16. 8 OR 9 OR 10 OR 11 OR 12 OR 13 OR 14 OR 15 (1280713)
17. 16 AND 8 (74709)
18. \*prevention/ (1252177)
19. 17 AND 18 (20526)
20. drugs OR medicines OR medications (1169931)
21. 19 AND 20 (2367)
22. "humans"[species] (13303958)
23. 21 AND 22 (2252)
24. barriers OR facilitators (73319)
25. 23 AND 24 (2442)

### **Stage 2 search**

Search of additional databases (131 additional references). Total 2573 references from Stage 1&2 searches. Eliminating duplicates led to 2188 references.

### **Stage 3 search**

Searching reference lists (18) and forward citation searching (40)

Supplementary Table 1a. Summary of findings of studies examining the associations of barriers/facilitators and adherence.

| Barriers/ Facilitators                  | Study (Author, Year, Setting)                                           | Context                                      | Study Design          | Sample Size | Study details                                                                                                                                                                                      | Outcome                                                                                      | Relevant findings (95% confidence intervals given where available)                                                                                                                                                                                                                                                                                                    |
|-----------------------------------------|-------------------------------------------------------------------------|----------------------------------------------|-----------------------|-------------|----------------------------------------------------------------------------------------------------------------------------------------------------------------------------------------------------|----------------------------------------------------------------------------------------------|-----------------------------------------------------------------------------------------------------------------------------------------------------------------------------------------------------------------------------------------------------------------------------------------------------------------------------------------------------------------------|
| Patient counselling                     | O'Carroll R, 2013 (UK) (21)                                             | First stroke/TIA                             | RCT                   | 62          | Intervention= two-physician-led counselling sessions aimed at increasing adherence                                                                                                                 | Adherence to antihypertensive medication at 3 months<br>Electronic pill bottle & self-report | <b>Intervention vs control: by electronic pill count, percentage of doses taken on schedule-96.8% vs 87.4%, mean difference 9.8 %, 95 % CI 0.2-16.2; p=0.048</b>                                                                                                                                                                                                      |
|                                         | Hornnes N, 2011 (Denmark) (22)                                          | Acute stroke/TIA                             | RCT                   | 349         | Intervention= 4 home visits by a nurse with individually tailored counselling on a healthy lifestyle.                                                                                              | Adherence to antihypertensive therapy at 1 year<br>Self-report                               | Intervention vs control: 98% vs 99%, OR 0.88, 95% CI 0.54-1.44 ; p=0.50                                                                                                                                                                                                                                                                                               |
|                                         | Maron DJ, 2010 (USA and Canada) (39)                                    | Stable CHD                                   | Prospective cohort    | 2287        | Nurse-led case management nested in the Clinical Outcomes Utilizing Revascularization and Aggressive Drug Evaluation (COURAGE) Trial. CVD drugs provided at no cost.                               | Adherence and persistence to 4D at 5 years<br>Self-report                                    | <b>Persistence increased from baseline to 5 years as follows: antiplatelets 87% to 96%, (OR 3.58, 95% CI 2.48-5.18); beta-blockers 69% to 85% (OR 2.54, 2.06-3.15); ARBs 46% to 72%(OR 3.02, 2.53-3.60), statins 64% to 93%(OR 7.51, 5.67-9.94), 4D 28% to 53% (OR 2.90, 95% CI 2.44-3.43) (all p&lt;0.001).</b><br>Adherence was 97% at 6 months and 95% at 5 years. |
|                                         | McManus JA, 2009 (UK) (23)                                              | Stroke in hospital                           | RCT                   | 102         | Intervention = 3-month,nurse-led health counselling with written and verbal information on lifestyle.                                                                                              | Adherence and persistence to 4D at 3 years<br>Self-report                                    | Persistence: 95% vs 89%, OR 3.00, 0.57-15.7 (p=0.19) for antiplatelets<br>97% vs 95%, OR 1.02, 0.55-1.91 (p=0.95) for antihypertensives<br>88% vs 89%, OR 1.03, 0.25- 4.14 (p=0.97) for statins<br>Adherence to 4D: 78% vs 92%, OR 0.30, 0.07-1.24 (p=0.10)                                                                                                           |
|                                         | Faulkner MA, 2000 (USA) (17)                                            | CABG                                         | RCT                   | 30          | Intervention=weekly pharmacy-led telephone contact for 12 weeks                                                                                                                                    | Adherence to lovastatin at 1 year and 2 years<br>Prescription fill rate                      | <b>Intervention vs control: 67% vs 33%; p&lt;0.05 at 1 year and 60% vs 27%; p&lt;0.05 at 2 years (chi-squared test reported)</b><br>At 1 yr, OR 4.00, 0.88-18.26; p=0.07, and at 2 yrs, OR 4.13, 0.88-19.27; p=0.07                                                                                                                                                   |
| Hospital quality improvement programmes | Bushnell C, 2011 (USA)(30)                                              | Ischemic stroke/TIA in hospital              | Retrospective cohort  | 2457        | Guideline implementation in the Adherence eValuation After Ischemic stroke-Longitudinal (AVAIL) Registry in a sample of hospitals participating in the Get With The Guidelines-Stroke program      | Persistence and adherence to 4D at 1 year<br>Self report                                     | <b>Persistence and adherence associated with: number of medications prescribed at discharge (OR=1.08, 1.04-1.11; p&lt;0.001 per 1 decrease); and follow-up appointment with primary care physician (OR=1.72, 1.12-2.52; p= 0.006).</b>                                                                                                                                |
|                                         | Johnston C, 2010 (USA) (19)                                             | Ischaemic stroke in hospital                 | RCT                   | 3361        | Intervention: assistance in the development and implementation of standardized stroke discharge orders.                                                                                            | Adherence to statin at 6 months<br>Prescription fill rate                                    | Intervention vs non-intervention hospitals,<br>At hospital level: OR, 1.26; 0.70 -2.30; p=0.36.<br><b>At individual level: OR, 1.29, 1.04-1.60; p=0.02.</b>                                                                                                                                                                                                           |
|                                         | Jackevicius CA, 2008 (Canada) (31)                                      | AMI in hospital                              | Retrospective cohort  | 4591        | Quality improvement of care in the Enhanced Feedback for Effective Cardiac Treatment (EFFECT) study registry in Ontario                                                                            | Adherence to 4D at 120 days<br>Prescription fill rate                                        | <b>PredischARGE medication counselling: OR 1.61, 1.26-2.04; p=0.0001</b><br><b>Cardiologist (vs GP) as doctor responsible for patient's care: OR 1.80, 1.34-2.43; p=0.0001.</b> Teaching vs other hospital: OR 1.35,0.93-1.97;p=0.11                                                                                                                                  |
| Generic versus branded drugs            | O'Brien EC, 2015 (USA) (37)                                             | NSTEMI in hospital                           | Retrospective cohort  | 1421        | NSTEMI patients: 65 years old discharged on a statin in 2006 from USA hospitals.                                                                                                                   | Adherence to statins at 1 year<br>Prescription refill rate                                   | Generic vs brand users: 86.0% [IQR = 42.6%-97.2%] vs 84.1% [IQR = 53.4%-97.0%]), (p= 0.97)                                                                                                                                                                                                                                                                            |
| Complexity of treatment regimen         | Castellano JM, 2014 (Argentina, Brazil, Italy, Paraguay &Spain)(25)     | Aged >40 years with acute MI in last 2 years | Cross-sectional study | 2118        | In a single visit, data was gathered to estimate prescription, adherence and barriers to adherence for aspirin, ACEIs, beta-blockers, and statins                                                  | Adherence to 4D<br>Self report                                                               | <b>Nonadherence was associated with age&lt;50years (OR 1.50, 95% CI 1.08-2.09; p=0.015), depression (OR 1.07, 95% CI 1.04-1.09; p&lt;0.001), being on a complex medication regimen (OR 1.42, 95% CI 1.00-2.02: p=0.047) and lower level of social support (OR 0.94 0.92-0.96; p&lt;0.001)</b>                                                                         |
| Fixed dose combination therapy          | Thom S, 2013 (India, Europe) (20)                                       | High CV risk                                 | RCT                   | 1698        | Intervention=FDC (containing either: 75 mg aspirin, 40 mg simvastatin, 10 mg lisinopril, and 50 mg atenolol or 75 mg aspirin, 40 mg simvastatin, 10 mg lisinopril and 12.5 mg hydrochlorothiazide) | Adherence to 4D at 15 months<br>Self report                                                  | <b>FDC vs separate medications: RR 1.29, 95% CI 1.22-1.36; p&lt;0.0001</b>                                                                                                                                                                                                                                                                                            |
|                                         | Castellano JM, 2014 (Argentina, Brazil, Italy, Paraguay and Spain) (25) | Aged >40 years with MI within last 2 years.  | RCT                   | 695         | Intervention=FDC (containing aspirin 100 mg, simvastatin 40 mg, and ramipril 2.5, 5, or 10 mg)                                                                                                     | Adherence at 9 months<br>Self report and pill count                                          | <b>FDC vs separate medications: RR 1.24, 95% CI 1.06 to 1.47; p= 0.009</b>                                                                                                                                                                                                                                                                                            |
|                                         | Selak V, 2014 (New Zealand)(28)                                         | High CV risk                                 | RCT                   | 233         | Intervention=FDC (with two versions available: aspirin 75 mg, simvastatin 40 mg, and lisinopril 10 mg with either atenolol 50 mg or hydrochlorothiazide 12.5 mg).                                  | Adherence to 4D at 12 months<br>Self report                                                  | <b>FDC vs separate medications: RR 1.50, 95% CI 1.25-1.82; p&lt;0001</b>                                                                                                                                                                                                                                                                                              |
|                                         | Patel A, 2015 (Australia, New Zealand)(26)                              | High CV risk                                 | RCT                   | 381         | Intervention=FDC (containing aspirin 75 mg, simvastatin 40 mg, lisinopril 10 mg and either atenolol 50 mg or hydrochlorothiazide 12.5 mg)                                                          | Adherence to 4D at 18 months (median follow-up)<br>Self report                               | <b>FDC vs separate medications: RR 1.26, 95% CI 1.08-1.48; p&lt;0001</b>                                                                                                                                                                                                                                                                                              |

| Barriers/ Facilitators                     | Study (Author, Year, Setting)      | Context                           | Study Design         | Sample Size | Study details                                                                                                                                  | Outcome                                                                    | Relevant findings (95% confidence intervals given where available)                                                                                                              |
|--------------------------------------------|------------------------------------|-----------------------------------|----------------------|-------------|------------------------------------------------------------------------------------------------------------------------------------------------|----------------------------------------------------------------------------|---------------------------------------------------------------------------------------------------------------------------------------------------------------------------------|
| Co-payments for medical care               | Winkelmayr WC, 2007 (Austria) (34) | AMI in hospital                   | Retrospective cohort | 4105        | The association between copayments and outpatient use of beta-blockers, statins, and ACEI/ARB in Austrian MI patients                          | Adherence at 120 days<br>Prescription refill rate                          | <b>Adherence (waived co-payments vs co-payment): OR 1.35; 95% CI 1.10–1.67 for ACEI/ARB, OR 1.09; 0.89–1.35 for <math>\beta</math>-blocker and OR 1.09;0.89–1.34 for statin</b> |
|                                            | Ye X, 2007 (USA) (35)              | CHD and hospital-initiated statin | Retrospective cohort | 5548        | Databases containing inpatient admission, outpatient, enrollment, and pharmacy claims from 1999 to 2003 to study associations with copayments. | Adherence to statins at 1 year<br>Prescription refill rate                 | <b>Non-adherence (co- payment <math>\geq</math>\$20 vs co-payment <math>&lt;</math>\$10): OR 0.42; 95% CI, 0.36–0.49.</b>                                                       |
| Insurance and prescription cost assistance | Choudhry NK, 2011 (USA) (27)       | AMI in hospital                   | RCT                  | 5855        | intervention= full prescription coverage by insurance-plan sponsor                                                                             | Adherence to 4D at 394 days (median follow-up)<br>Prescription refill rate | <b>Full-coverage vs usual coverage: OR 1.41, 95% CI 1.18-1.56; p&lt;0.001 for 4D and p&lt;0.001 for all individual drug classes.</b>                                            |

Supplementary Table 1b. Summary of findings of studies examining the associations of barriers/facilitators and persistence.

| Barriers/ Facilitators                          | Study (Author, Year, Setting)        | Context                                        | Study Design                                  | Sample Size | Study details                                                                                                                                                                                 | Outcome                                                                           | Relevant findings (95% confidence intervals given where available)                                                                                                                                                                                                                                                                                                                                  |
|-------------------------------------------------|--------------------------------------|------------------------------------------------|-----------------------------------------------|-------------|-----------------------------------------------------------------------------------------------------------------------------------------------------------------------------------------------|-----------------------------------------------------------------------------------|-----------------------------------------------------------------------------------------------------------------------------------------------------------------------------------------------------------------------------------------------------------------------------------------------------------------------------------------------------------------------------------------------------|
| Patient counselling                             | Maron DJ, 2010 (USA and Canada) (39) | Stable CHD                                     | Prospective cohort                            | 2287        | Nurse-led case management nested in the Clinical Outcomes Utilizing Revascularization and Aggressive Drug Evaluation (COURAGE) Trial. CVD drugs provided at no cost.                          | Adherence and persistence to 4D at 5 years<br>Self-report                         | <b>Persistence increased from baseline to 5 years as follows: antiplatelets 87% to 96%, (OR 3.58, 95% CI 2.48-5.18); beta-blockers 69% to 85% (OR 2.54, 2.06-3.15); ARBs 46% to 72%(OR 3.02, 2.53-3.60), statins 64% to 93%(OR 7.51, 5.67-9.94), 4D 28% to 53% (OR 2.90, 95% CI 2.44-3.43) (all p&lt;0.001).</b><br>Adherence was 97% at 6 months and 95% at 5 years (OR 0.60, 0.40-0.90, p=0.013). |
|                                                 | McManus JA, 2009 (UK) (23)           | Stroke in hospital                             | RCT                                           | 102         | Intervention = 3-month,nurse-led health counselling with written and verbal information on lifestyle.                                                                                         | Adherence and persistence to 4D at 3 years<br>Self-report                         | Persistence: 95% vs 89%, OR 3.00, 0.57-15.7 (p=0.19) for antiplatelets<br>97% vs 95%, OR 1.02, 0.55-1.91 (p=0.95) for antihypertensives<br>88% vs 89%, OR 1.03, 0.25- 4.14 (p=0.97) for statins<br>Adherence to 4D: 78% vs 92%, OR 0.30, 0.07-1.24 (p=0.10)                                                                                                                                         |
|                                                 | Hohmann C, 2009 (Germany) (29)       | Ischemic stroke/TIA in hospital                | Non-randomized, controlled intervention trial | 255         | Intervention=hospital pharmacist counselling before discharge and plan for out-patient care plus counselling by community pharmacists                                                         | Persistence to aspirin and clopidogrel at 1 year<br>Self-reported and GP-reported | Intervention: 38.7% vs 32.7%, OR 1.30, 0.73-2.31; p=0.37 for aspirin and 26.7% and 30.1%, OR 0.85, 0.46-1.57; p=0.60 for clopidogrel                                                                                                                                                                                                                                                                |
|                                                 | Lafitte M, 2009 (France) (36)        | ACS in hospital                                | Prospective cohort                            | 660         | 3 months after discharge for ACS, consecutive patients were invited to join a comprehensive risk factor management programme                                                                  | Persistence to 4D at 20 months (mean follow-up)<br>Self-report                    | At follow-up and baseline respectively but no control group reported:<br>86% vs 98% for beta blocker or a calcium antagonist, 88% vs 94% for statin, 96% vs 100% for antiplatelet, 62% vs 82% for ACEI/ARB, 76% vs 92% for 4D                                                                                                                                                                       |
|                                                 | Yilmaz MB, 2005 (Turkey) (24)        | On statin for secondary prevention in hospital | RCT                                           | 202         | Intervention=counselling regarding efficacy, pharmacokinetic profile, and side effects of their statins.                                                                                      | Persistence to statin therapy at 15 months (median follow-up)<br>Self-report      | <b>62.7% versus 46%; OR=1.98, 1.13-3.47; p=0.017</b>                                                                                                                                                                                                                                                                                                                                                |
| Hospital quality improvement programmes         | Bushnell C, 2011 (USA)(30)           | Ischemic stroke/TIA in hospital                | Retrospective cohort                          | 2457        | Guideline implementation in the Adherence eValuation After Ischemic stroke–Longitudinal (AVAIL) Registry in a sample of hospitals participating in the Get With The Guidelines–Stroke program | Persistence and adherence to 4D at 1 year<br>Self report                          | <b>Persistence and adherence associated with: number of medications prescribed at discharge (OR=1.08, 1.04-1.11; p&lt;0.001 per 1 decrease); and follow-up appointment with primary care physician (OR=1.72, 1.12-2.52; p=0.006).</b>                                                                                                                                                               |
|                                                 | Khanderia U, 2005 (USA) (40)         | CABG in hospital                               | Retrospective case-control                    | 403         | A Physician education protocol to implement statin in all patients admitted for CABG.                                                                                                         | Persistence to statins at 6 months<br>Self-report                                 | Intervention vs control: 67% vs 58%, OR 1.49, 0.88-2.55; p=0.14                                                                                                                                                                                                                                                                                                                                     |
| Site of care and home circumstances of patients | Glader E-L, 2010 (Sweden) (32)       | Acute stroke in hospital                       | Prospective cohort                            | 21077       | A 1-year cohort (September 2005–August 2006) from the Swedish Stroke Register.                                                                                                                | Persistence with 4D at 1 year<br>Prescription fill rate                           | <b>Institutional living correlated with persistence for all drug classes (p=0.001). Stroke unit care was associated with persistence for statins (p=0.007). Support by next-of-kin associated with persistence for antihypertensives (p=0.001).</b>                                                                                                                                                 |
| Physician education/training                    | Ko DT, 2005 (Canada) (18)            | AMI aged≥65 years in hospital                  | Retrospective cohort                          | 63301       | Evaluation on whether care by International medical graduates(IMGs) is a determinant of poor persistence and worse outcomes after AMI versus care by Canadian medical graduates (CMGs)        | Persistence to 4D at 90 days<br>Prescription refill                               | Adjusted OR(IMG/Canadian): aspirin 1.00 95% CI (0.94 - 1.06); BB 1.01 (0.94 - 1.08); ACEI <b>1.07 (1.01 - 1.14); statins 1.10 (1.01-1.20)</b>                                                                                                                                                                                                                                                       |
|                                                 | Harats D, 2005 (Israel) (33)         | CHD in hospital                                | Cross-sectional then prospective Cohort       | 2994        | Brief educational sessions with physicians to review National guidelines to ascertain physician's awareness                                                                                   | Persistence to statins at 8 weeks<br>Self-report                                  | Intervention vs control: <b>57% vs 45%. (p&lt;0001)</b>                                                                                                                                                                                                                                                                                                                                             |
| Insurance and prescription cost assistance      | Mathews R, 2015 (USA) (38)           | ACS in hospital                                | Prospective cohort                            | 7955        | Within the Treatment with Adenosine Diphosphate Receptor Inhibitors: Longitudinal Assessment of Treatment Patterns and Events after Acute Coronary Syndrome (TRANSLATE-ACS) study.            | Persistence to 4D at 6 months<br>Self-report                                      | <b>Non-persistence less likely with private insurance (OR 0.85, 95% CI 0.76-0.95),prescription cost assistance (OR 0.63, 0.54-0.75),and clinic follow-up arranged pre-discharge (OR 0.89, 0.80-0.99)</b>                                                                                                                                                                                            |

Supplementary Table 1c. Summary of findings of studies examining the associations of barriers/facilitators and adherence/persistence by drug class.

| Study (Author, Year, Setting)                                       | Context                                      | Study Design          | Sample Size | Study details                                                                                                                                                                                      | Outcome                                                                    | Relevant findings (95% confidence intervals given where available)                                                                                                                                                                                                                                                                                                 |
|---------------------------------------------------------------------|----------------------------------------------|-----------------------|-------------|----------------------------------------------------------------------------------------------------------------------------------------------------------------------------------------------------|----------------------------------------------------------------------------|--------------------------------------------------------------------------------------------------------------------------------------------------------------------------------------------------------------------------------------------------------------------------------------------------------------------------------------------------------------------|
| <b>4D</b>                                                           |                                              |                       |             |                                                                                                                                                                                                    |                                                                            |                                                                                                                                                                                                                                                                                                                                                                    |
| Maron DJ, 2010 (USA and Canada) (39)                                | Stable CHD                                   | Prospective cohort    | 2287        | Nurse-led case management nested in the Clinical Outcomes Utilizing Revascularization and Aggressive Drug Evaluation (COURAGE) Trial. CVD drugs provided at no cost.                               | Adherence and persistence to 4D at 5 years<br>Self-report                  | <b>Persistence increased from baseline to 5 years as follows: antiplatelets 87% to 96%, (OR 3.58, 95% CI 2.48-5.18); beta-blockers 69% to 85% (OR 2.54, 2.06-3.15); ARBs 46% to 72%(OR 3.02, 2.53-3.60), statins 64% to 93%(OR 7.51, 5.67-9.94), 4D 28% to 53% (OR 2.90, 95% CI 2.44-3.43) (all p&lt;0.001).</b> Adherence was 97% at 6 months and 95% at 5 years. |
| McManus JA, 2009 (UK) (23)                                          | Stroke in hospital                           | RCT                   | 102         | Intervention = 3-month,nurse-led health counselling with written and verbal information on lifestyle.                                                                                              | Adherence and persistence to 4D at 3 years<br>Self-report                  | Persistence: 95% vs 89%, OR 3.00, 0.57-15.7 (p=0.19) for antiplatelets<br>97% vs 95%, OR 1.02, 0.55-1.91 (p=0.95) for antihypertensives<br>88% vs 89%, OR 1.03, 0.25- 4.14 (p=0.97) for statins<br>Adherence to 4D: 78% vs 92%, OR 0.30, 0.07-1.24 (p=0.10)                                                                                                        |
| Lafitte M, 2009 (France) (36)                                       | ACS in hospital                              | Prospective cohort    | 660         | 3 months after discharge for ACS, consecutive patients were invited to join a comprehensive risk factor management programme                                                                       | Persistence to 4D at 20 months (mean follow-up)<br>Self-report             | At follow-up and baseline respectively but no control group reported:<br>86% vs 98% for beta blocker or a calcium antagonist, 88% vs 94% for statin,<br>96% vs 100% for antiplatelet, 62% vs 82%<br>for ACEI/ARB, 76% vs 92% for 4D                                                                                                                                |
| Bushnell C, 2011 (USA)(30)                                          | Ischemic stroke/TIA in hospital              | Retrospective cohort  | 2457        | Guideline implementation in the Adherence eValuation After Ischemic stroke-Longitudinal (AVAIL) Registry in a sample of hospitals participating in the Get With The Guidelines-Stroke program      | Persistence and adherence to 4D at 1 year<br>Self report                   | <b>Persistence and adherence associated with: number of medications prescribed at discharge (OR=1.08, 1.04-1.11; p&lt;0.001 per 1 decrease); and follow-up appointment with primary care physician (OR=1.72, 1.12-2.52; p=0.006).</b>                                                                                                                              |
| Jackevicius CA, 2008 (Canada) (31)                                  | AMI in hospital                              | Retrospective cohort  | 4591        | Quality improvement of care in the Enhanced Feedback for Effective Cardiac Treatment (EFFECT) study registry in Ontario                                                                            | Adherence to 4D at 120 days<br>Prescription fill rate                      | <b>Predischarge medication counselling: OR 1.61, 1.26-2.04; p=0.0001</b><br><b>Cardiologist (vs GP) as doctor responsible for patient's care: OR 1.80, 1.34-2.43; p=0.0001.</b> Teaching vs other hospital: OR 1.35,0.93-1.97;p=0.11                                                                                                                               |
| Glader E-L, 2010 (Sweden) (32)                                      | Acute stroke in hospital                     | Prospective cohort    | 21077       | A 1-year cohort (September 2005-August 2006) from the Swedish Stroke Register.                                                                                                                     | Persistence with 4D at 1 year<br>Prescription fill rate                    | <b>Institutional living correlated with persistence for all drug classes (p=0.001). Stroke unit care was associated with persistence for statins (p=0.007).</b><br><b>Support by next-of-kin associated with persistence for antihypertensives (p=0.001).</b>                                                                                                      |
| Castellano JM, 2014 (Argentina, Brazil, Italy, Paraguay &Spain)(25) | Aged >40 years with acute MI in last 2 years | Cross-sectional study | 2118        | In a single visit, data was gathered to estimate prescription, adherence and barriers to adherence for aspirin, ACEIs, beta-blockers, and statins                                                  | Adherence to 4D<br>Self report                                             | <b>Nonadherence was associated with age&lt;50years (OR 1.50, 95% CI 1.08-2.09; p=0.015), depression (OR 1.07, 95% CI 1.04-1.09; p&lt;0.001), being on a complex medication regimen (OR 1.42, 95% CI 1.00-2.02: p=0.047) and lower level of social support (OR 0.94 0.92-0.96; p&lt;0.001)</b>                                                                      |
| Thom S, 2013 (India, Europe) (20)                                   | High CV risk                                 | RCT                   | 1698        | Intervention=FDC (containing either: 75 mg aspirin, 40 mg simvastatin, 10 mg lisinopril, and 50 mg atenolol or 75 mg aspirin, 40 mg simvastatin, 10 mg lisinopril and 12.5 mg hydrochlorothiazide) | Adherence to 4D at 15 months<br>Self report                                | <b>FDC vs separate medications: RR 1.29, 95% CI 1.22-1.36; p&lt;0.0001</b>                                                                                                                                                                                                                                                                                         |
| Selak V, 2014 (New Zealand)(28)                                     | High CV risk                                 | RCT                   | 233         | Intervention=FDC (with two versions available: aspirin 75 mg, simvastatin 40 mg, and lisinopril 10 mg with either atenolol 50 mg or hydrochlorothiazide 12.5 mg).                                  | Adherence to 4D at 12 months<br>Self report                                | <b>FDC vs separate medications: RR 1.50, 95% CI 1.25-1.82; p&lt;0001</b>                                                                                                                                                                                                                                                                                           |
| Patel A, 2015 (Australia, New Zealand)(26)                          | High CV risk                                 | RCT                   | 381         | Intervention=FDC (containing aspirin 75 mg, simvastatin 40 mg, lisinopril 10 mg and either atenolol 50 mg or hydrochlorothiazide 12.5 mg)                                                          | Adherence to 4D at 18 months (median follow-up)<br>Self report             | <b>FDC vs separate medications: RR 1.26, 95% CI 1.08-1.48; p&lt;0001</b>                                                                                                                                                                                                                                                                                           |
| Ko DT, 2005 (Canada) (18)                                           | AMI aged≥65 years in hospital                | Retrospective cohort  | 63301       | Evaluation on whether care by International medical graduates (IMGs) is a determinant of poor persistence and worse outcomes after AMI versus care by Canadian medical graduates (CMGs)            | Persistence to 4D at 90 days<br>Prescription refill                        | Adjusted OR(IMG/Canadian): aspirin 1.00 95% CI (0.94 - 1.06); BB 1.01 (0.94 - 1.08); ACEI 1.07 (1.01 - 1.14); statins 1.10 (1.01-1.20)                                                                                                                                                                                                                             |
| Choudhry NK, 2011 (USA) (27)                                        | AMI in hospital                              | RCT                   | 5855        | Intervention= full prescription coverage by insurance-plan sponsor                                                                                                                                 | Adherence to 4D at 394 days (median follow-up)<br>Prescription refill rate | <b>Full-coverage vs usual coverage: OR 1.41, 95% CI 1.18-1.56; p&lt;0.001 for 4D and p&lt;001 for all individual drug classes.</b>                                                                                                                                                                                                                                 |
| Mathews R, 2015 (USA) (38)                                          | ACS in hospital                              | Prospective cohort    | 7955        | Within the Treatment with Adenosine Diphosphate Receptor Inhibitors: Longitudinal Assessment of Treatment Patterns and Events after Acute Coronary Syndrome (TRANSLATE-ACS) study.                 | Persistence to 4D<br>Self-report                                           | <b>Non-persistence less likely with private insurance (OR 0.85, 95% CI 0.76-0.95),prescription cost assistance (OR 0.63, 0.54-0.75),and clinic follow-up arranged pre-discharge (OR 0.89, 0.80-0.99)</b>                                                                                                                                                           |

| Study (Author, Year, Setting)                                           | Context                                        | Study Design                                  | Sample Size | Study details                                                                                                                                  | Outcome                                                                                      | Relevant findings (95% confidence intervals given where available)                                                                                                                                                  |
|-------------------------------------------------------------------------|------------------------------------------------|-----------------------------------------------|-------------|------------------------------------------------------------------------------------------------------------------------------------------------|----------------------------------------------------------------------------------------------|---------------------------------------------------------------------------------------------------------------------------------------------------------------------------------------------------------------------|
| <b>Antihypertensive</b>                                                 |                                                |                                               |             |                                                                                                                                                |                                                                                              |                                                                                                                                                                                                                     |
| O'Carroll R, 2013 (UK) (21)                                             | First stroke/TIA                               | RCT                                           | 62          | Intervention= two-physician-led counselling sessions aimed at increasing adherence                                                             | Adherence to antihypertensive medication at 3 months<br>Electronic pill bottle & self-report | <b>Intervention vs control: by electronic pill count, percentage of doses taken on schedule-96.8% vs 87.4%, mean difference 9.8 %, 95 % CI 0.2-16.2; p=0.048</b>                                                    |
| Hornnes N, 2011 (Denmark) (22)                                          | Acute stroke/TIA                               | RCT                                           | 349         | Intervention= 4 home visits by a nurse with individually tailored counselling on a healthy lifestyle.                                          | Adherence to antihypertensive therapy at 1 year<br>Self-report                               | Intervention vs control: 98% vs 99%, OR 0.88, 95% CI 0.54-1.44 ; p=0.50                                                                                                                                             |
| <b>Antiplatelet</b>                                                     |                                                |                                               |             |                                                                                                                                                |                                                                                              |                                                                                                                                                                                                                     |
| Hohmann C, 2009 (Germany) (29)                                          | Ischemic stroke/TIA in hospital                | Non-randomized, controlled intervention trial | 255         | Intervention=hospital pharmacist counselling before discharge and plan for out-patient care plus counselling by community pharmacists          | Persistence to aspirin and clopidogrel at 1 year<br>Self-reported and GP-reported            | Intervention: 38.7% vs 32.7%, OR 1.30, 0.73-2.31; p=0.37 for aspirin and 26.7% and 30.1%, OR 0.85, 0.46-1.57; p=0.60 for clopidogrel                                                                                |
| <b>Statin</b>                                                           |                                                |                                               |             |                                                                                                                                                |                                                                                              |                                                                                                                                                                                                                     |
| Faulkner MA, 2000 (USA) (17)                                            | CABG                                           | RCT                                           | 30          | Intervention=weekly pharmacist-led telephone contact for 12 weeks                                                                              | Adherence to lovastatin at 1 year and 2 years<br>Prescription fill rate                      | <b>Intervention vs control: 67% vs 33%; p&lt;0.05 at 1 year and 60% vs 27%; p&lt;0.05 at 2 years (chi-squared test reported)</b><br>At 1 yr, OR 4.00, 0.88-18.26; p=0.07, and at 2 yrs, OR 4.13, 0.88-19.27; p=0.07 |
| Yilmaz MB, 2005 (Turkey) (24)                                           | On statin for secondary prevention in hospital | RCT                                           | 202         | Intervention=counselling regarding efficacy, pharmacokinetic profile, and side effects of their statins.                                       | Persistence to statin therapy at 15 months (median follow-up)<br>Self-report                 | <b>62.7% versus 46%; OR=1.98, 1.13-3.47; p=0.017</b>                                                                                                                                                                |
| Johnston C, 2010 (USA) (19)                                             | Ischaemic stroke in hospital                   | RCT                                           | 3361        | Intervention: assistance in the development and implementation of standardized stroke discharge orders.                                        | Adherence to statin at 6 months<br>Prescription fill rate                                    | Intervention vs non-intervention hospitals.<br>At hospital level: OR, 1.26; 0.70 –2.30; p=0.36.<br><b>At individual level: OR, 1.29, 1.04-1.60; p=0.02.</b>                                                         |
| Khanderia U, 2005 (USA) (40)                                            | CABG in hospital                               | Retrospective case-control                    | 403         | A Physician education protocol to implement statin in all patients admitted for CABG.                                                          | Persistence to statins at 6 months<br>Self-report                                            | Intervention vs control: 67% vs 58%, OR 1.49, 0.88-2.55; p=0.14                                                                                                                                                     |
| O'Brien EC, 2015 (USA) (37)                                             | NSTEMI in hospital                             | Retrospective cohort                          | 1421        | NSTEMI patients ≥ 65 years old discharged on a statin in 2006 from USA hospitals.                                                              | Adherence to statins at 1 year<br>Prescription refill rate                                   | Generic vs brand users: 86.0% [IQR = 42.6%-97.2%] vs 84.1% [IQR = 53.4%-97.0%], (p= 0.97)                                                                                                                           |
| Harats D, 2005 (Israel) (33)                                            | CHD in hospital                                | Cross-sectional then prospective Cohort       | 2994        | Brief educational sessions with physicians to review National guidelines to ascertain physician's awareness                                    | Persistence to statins at 8 weeks<br>Self-report                                             | Intervention vs control: <b>57% vs 45%. (p&lt;0001)</b>                                                                                                                                                             |
| Ye X, 2007 (USA) (35)                                                   | CHD and hospital-initiated statin              | Retrospective cohort                          | 5548        | Databases containing inpatient admission, outpatient, enrollment, and pharmacy claims from 1999 to 2003 to study associations with copayments. | Adherence to statins at 1 year<br>Prescription refill rate                                   | <b>Non-adherence (co- payment ≥\$20 vs co-payment &lt;\$10): OR 0.42; 95% CI, 0.36–0.49.</b>                                                                                                                        |
| <b>Beta-blockers, statins and ACEI/ARB</b>                              |                                                |                                               |             |                                                                                                                                                |                                                                                              |                                                                                                                                                                                                                     |
| Winkelmayer WC, 2007 (Austria) (34)                                     | AMI in hospital                                | Retrospective cohort                          | 4105        | The association between copayments and outpatient use of beta-blockers, statins, and ACEI/ARB in Austrian MI patients                          | Adherence at 120 days<br>Prescription refill rate                                            | <b>Adherence (waived co-payments vs co-payment): OR 1.35; 95% CI 1.10–1.67 for ACEI/ARB, OR 1.09; 0.89–1.35 for β-blocker and OR 1.09;0.89–1.34 for statin</b>                                                      |
| <b>Beta-blockers, statins and ACEI/ARB</b>                              |                                                |                                               |             |                                                                                                                                                |                                                                                              |                                                                                                                                                                                                                     |
| Castellano JM, 2014 (Argentina, Brazil, Italy, Paraguay and Spain) (25) | Aged >40 years with MI within last 2 years.    | RCT                                           | 695         | Intervention=FDC (containing aspirin 100 mg, simvastatin 40 mg, and ramipril 2.5, 5, or 10 mg)                                                 | Adherence to 4D at 9 months<br>Self report and pill count                                    | <b>FDC vs separate medications: RR 1.24, 95% CI 1.06 to 1.47; p= 0.009</b>                                                                                                                                          |

Supplementary Figure 1. Funnel plot for publication bias

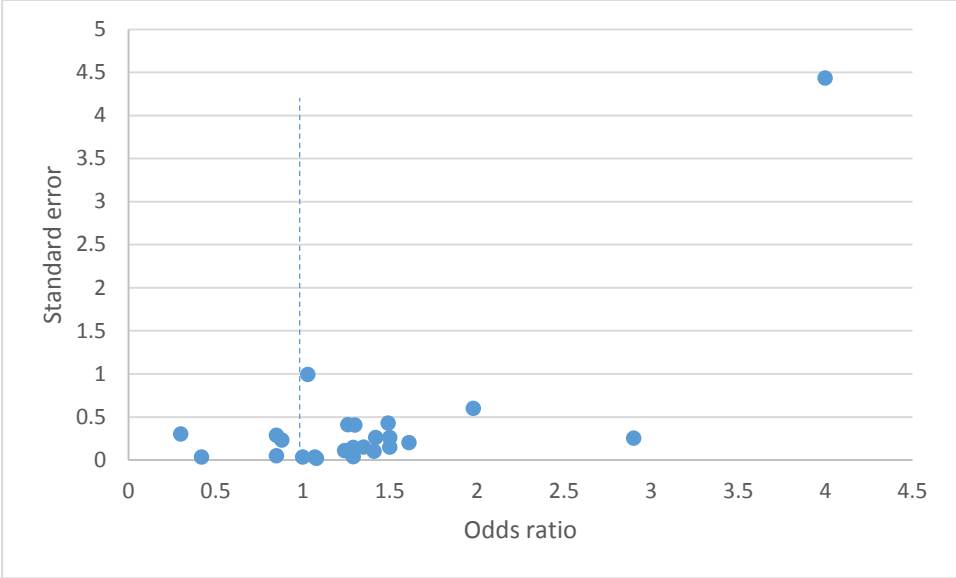



## Appendix 2. Cochrane tool for assessment of risk of bias

| Bias domain      | Source of bias                          | Support for judgment                                                                                                                                                                                                                                                                                                                                                   | Review authors' judgment<br>(assess as low, unclear or high risk of bias)                                          |
|------------------|-----------------------------------------|------------------------------------------------------------------------------------------------------------------------------------------------------------------------------------------------------------------------------------------------------------------------------------------------------------------------------------------------------------------------|--------------------------------------------------------------------------------------------------------------------|
| Selection bias   | Random sequence generation              | Describe the method used to generate the allocation sequence in sufficient detail to allow an assessment of whether it should produce comparable groups                                                                                                                                                                                                                | Selection bias (biased allocation to interventions) due to inadequate generation of a randomised sequence          |
|                  | Allocation concealment                  | Describe the method used to conceal the allocation sequence in sufficient detail to determine whether intervention allocations could have been foreseen before or during enrolment                                                                                                                                                                                     | Selection bias (biased allocation to interventions) due to inadequate concealment of allocations before assignment |
| Performance bias | Blinding of participants and personnel* | Describe all measures used, if any, to blind trial participants and researchers from knowledge of which intervention a participant received. Provide any information relating to whether the intended blinding was effective                                                                                                                                           | Performance bias due to knowledge of the allocated interventions by participants and personnel during the study    |
| Detection bias   | Blinding of outcome assessment*         | Describe all measures used, if any, to blind outcome assessment from knowledge of which intervention a participant received. Provide any information relating to whether the intended blinding was effective                                                                                                                                                           | Detection bias due to knowledge of the allocated interventions by outcome assessment                               |
| Attrition bias   | Incomplete outcome data*                | Describe the completeness of outcome data for each main outcome, including attrition and exclusions from the analysis. State whether attrition and exclusions were reported, the numbers in each intervention group (compared with total randomised participants), reasons for attrition or exclusions where reported, and any reinclusions in analyses for the review | Attrition bias due to amount, nature, or handling of incomplete outcome data                                       |
| Reporting bias   | Selective reporting                     | State how selective outcome reporting was examined and what was found                                                                                                                                                                                                                                                                                                  | Reporting bias due to selective outcome reporting                                                                  |
| Other bias       | Anything else, ideally prespecified     | State any important concerns about bias not covered in the other domains in the tool                                                                                                                                                                                                                                                                                   | Bias due to problems not covered elsewhere                                                                         |

### Appendix 3. Tool for assessing risk of bias for observational studies

| Type of bias                       | Study design                                                                                                                                                                |                                                                            |                                                                                           |                                                                                                                                |
|------------------------------------|-----------------------------------------------------------------------------------------------------------------------------------------------------------------------------|----------------------------------------------------------------------------|-------------------------------------------------------------------------------------------|--------------------------------------------------------------------------------------------------------------------------------|
|                                    | Cross sectional                                                                                                                                                             | Case control                                                               | Cohort                                                                                    | Ecological                                                                                                                     |
| Selection bias                     | Was the study population selected appropriate?                                                                                                                              |                                                                            |                                                                                           |                                                                                                                                |
|                                    | Was the sample representative of its target population?                                                                                                                     | Were the controls randomly selected from the same population as the cases? | Was an appropriate control group used?<br><br>Was follow up sufficiently complete? (>80%) | Were the subjects representative of the group, place, or population of interest?                                               |
| Differential misclassification     | Did the assessment of the exposure or outcome differ according to the patient status?                                                                                       | Did the exposure assessment differ for cases and controls?                 | Did the outcome assessment differ for exposed and non exposed?                            | Were the exposure and outcome variables measured and defined in the same or a similar way across the different groups studied? |
| Non-differential misclassification | Were valid methods used for measuring medication adherence and persistence?                                                                                                 |                                                                            |                                                                                           |                                                                                                                                |
| Confounding                        | Was any strategy undertaken to control for potential confounders?                                                                                                           |                                                                            |                                                                                           |                                                                                                                                |
|                                    | <ol style="list-style-type: none"> <li>1. At the design stage (restriction, matching)</li> <li>2. At the analysis stage (stratification, multivariable analysis)</li> </ol> |                                                                            |                                                                                           |                                                                                                                                |

**Define each domain as low risk of bias, unclear risk of bias or high risk of bias**
